# Supplementary material for: Historical Silk: A Novel Method to Evaluate Degumming with Non-Invasive Infrared Spectroscopy and Spectral Deconvolution
Source: MDPI journal article supplement (doi:10.3390/ma16051819), 2023-02-22
Supplement: s1 [file s1]

Figure S1. Scheme of the main parts of the traditional Japanese armour.

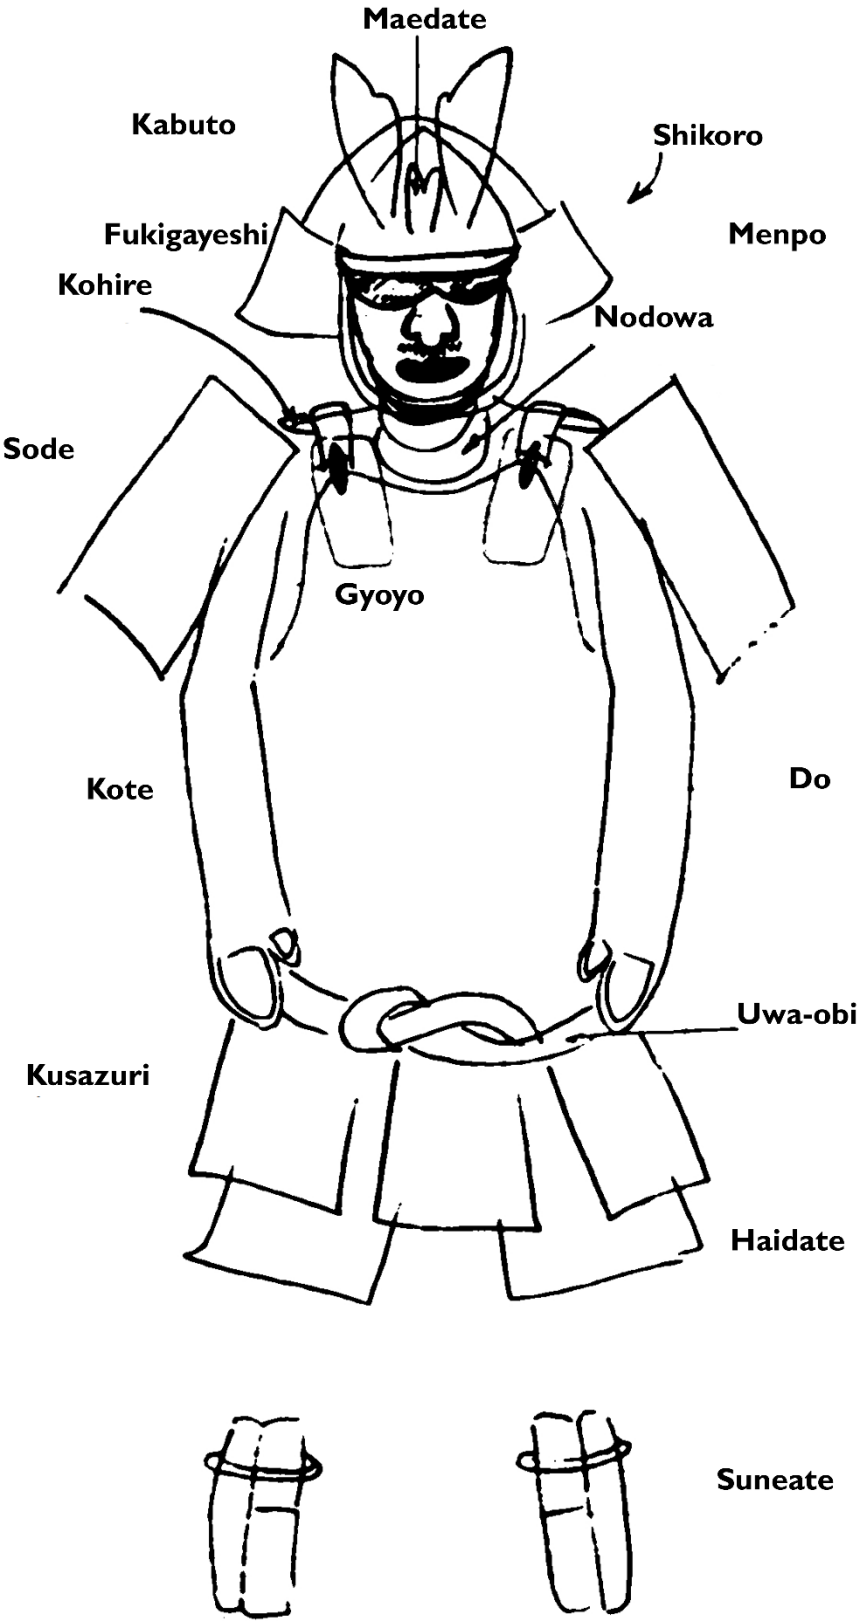

Table S1. List of samples from the Morigi collection. Each sample is linked to its armour reported with its inventory number. On the right, for each sample the presumed dating, the colour, the armour part which the sample comes from and the kind of textile are reported.

| Sample | Armour     | Presumed dating           | Colour            | Armour part | Kind of textile    |
|--------|------------|---------------------------|-------------------|-------------|--------------------|
| 1_2    | 2017.Mor.1 | late 16 <sup>th</sup> c.  | orange            | kabuto      | chin cord          |
| 1_6    | 2017.Mor.1 | late 16 <sup>th</sup> c.  | orange            | nodowa      | lacing braid       |
| 1_8    | 2017.Mor.1 | late 16 <sup>th</sup> c.  | white             | sode        | lacing braid       |
| 1_9    | 2017.Mor.1 | late 16 <sup>th</sup> c.  | orange            | sode        | lacing braid       |
| 1_26   | 2017.Mor.1 | late 16 <sup>th</sup> c.  | blue              | suneate     | lacing braid       |
| 2_2    | 2017.Mor.2 | late 19 <sup>th</sup> c.  | orange            | nodowa      | lacing braid       |
| 2_3    | 2017.Mor.2 | late 19 <sup>th</sup> c.  | orange            | shikoro     | lacing braid       |
| 3_3    | 2017.Mor.3 | 17 <sup>th</sup> c.       | white             | kusazuri    | lacing braid       |
| 3_4    | 2017.Mor.3 | 17 <sup>th</sup> c.       | green             | haidate     | embroidered lining |
| 3_8    | 2017.Mor.3 | 17 <sup>th</sup> c.       | green             | kusazuri    | lacing braid       |
| 3_10   | 2017.Mor.3 | 17 <sup>th</sup> c.       | blue              | do          | cord               |
| 3_11   | 2017.Mor.3 | 17 <sup>th</sup> c.       | orange            | sode        | lacing braid       |
| 3_12   | 2017.Mor.3 | 17 <sup>th</sup> c.       | blue              | sode        | lacing braid       |
| 3_18   | 2017.Mor.3 | 17 <sup>th</sup> c.       | blue              | casacca     | brocade lining     |
| 3_23   | 2017.Mor.3 | late 16 <sup>th</sup> c.  | orange            | kabuto      | chin cord          |
| 4_2    | 2017.Mor.4 | 18 <sup>th</sup> c.       | blue              | haidate     | brocade lining     |
| 4_3    | 2017.Mor.4 | 18 <sup>th</sup> c.       | blue              | kusazuri    | lacing braid       |
| 4_4    | 2017.Mor.4 | 18 <sup>th</sup> c.       | light orange      | kusazuri    | lacing braid       |
| 4_11   | 2017.Mor.4 | 18 <sup>th</sup> c.       | yellow/blue       | haidate     | brocade lining     |
| 4_13   | 2017.Mor.4 | 18 <sup>th</sup> c.       | blue              | kote        | embroidered lining |
| 5_1    | 2017.Mor.5 | after 1926                | green             | kusazuri    | lacing braid       |
| 5_2    | 2017.Mor.5 | after 1926                | white             | kusazuri    | lacing braid       |
| 5_9    | 2017.Mor.5 | after 1926                | yellow            | do          | tassel             |
| 7_4    | 2017.Mor.7 | 17 <sup>th</sup> c.       | blue              | kusazuri    | lacing braid       |
| 7_8    | 2017.Mor.7 | 17 <sup>th</sup> c.       | light blue/yellow | kote        | brocade lining     |
| 8_12   | 2017.Mor.8 | 17 <sup>th</sup> c.       | blue              | kusazuri    | lacing braid       |
| 8_18   | 2017.Mor.8 | 17 <sup>th</sup> c.       | yellow            | sode        | internal lining    |
| 8_4    | 2017.Mor.8 | early 16 <sup>th</sup> c. | blue              | suneate     | cord               |
| 8_7    | 2017.Mor.8 | early 16 <sup>th</sup> c. | light orange      | kabuto      | lacing braid       |
| 9_17   | 2017.Mor.9 | late 19 <sup>th</sup> c.  | yellow            | kabuto      | tassel             |
| 9_5    | 2017.Mor.9 | late 19 <sup>th</sup> c.  | orange            | kusazuri    | lacing braid       |
| 9_6    | 2017.Mor.9 | late 19 <sup>th</sup> c.  | orange            | kusazuri    | lacing braid       |

c. is the abbreviation for century.

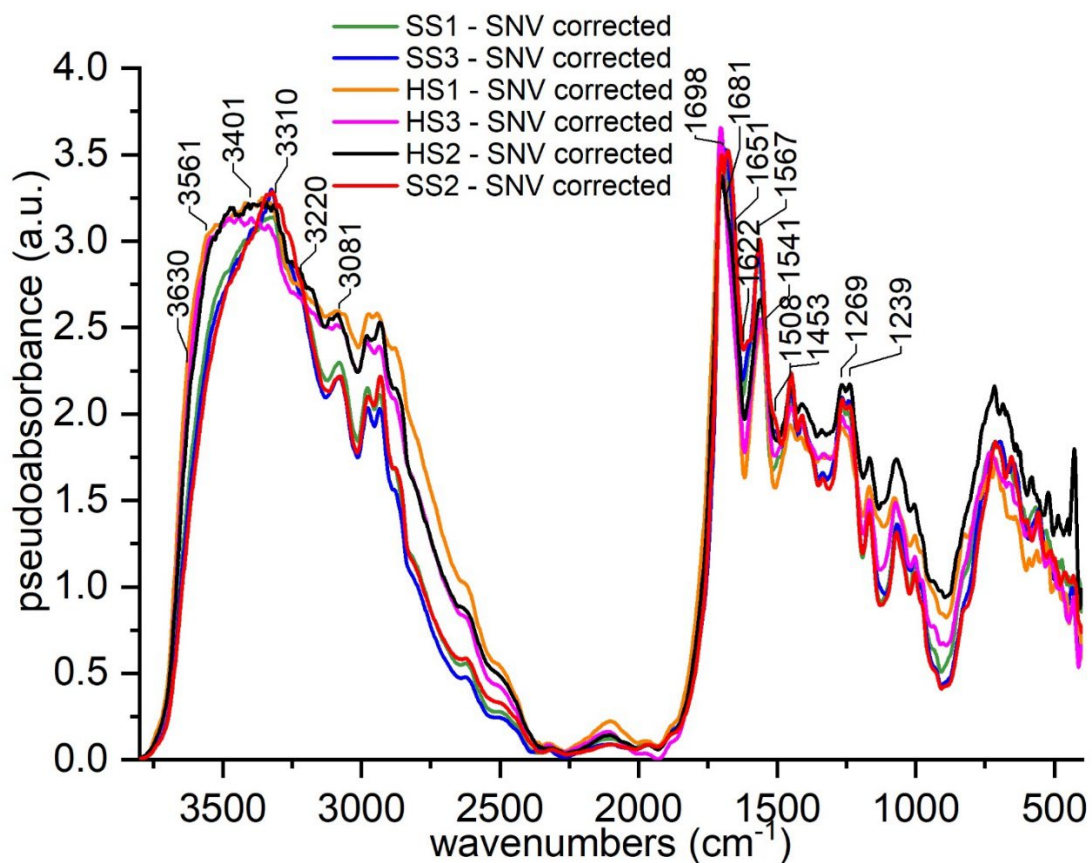

Figure S2. ER-FTIR spectra of hard and soft silk references (region 3800-400  $\text{cm}^{-1}$ )

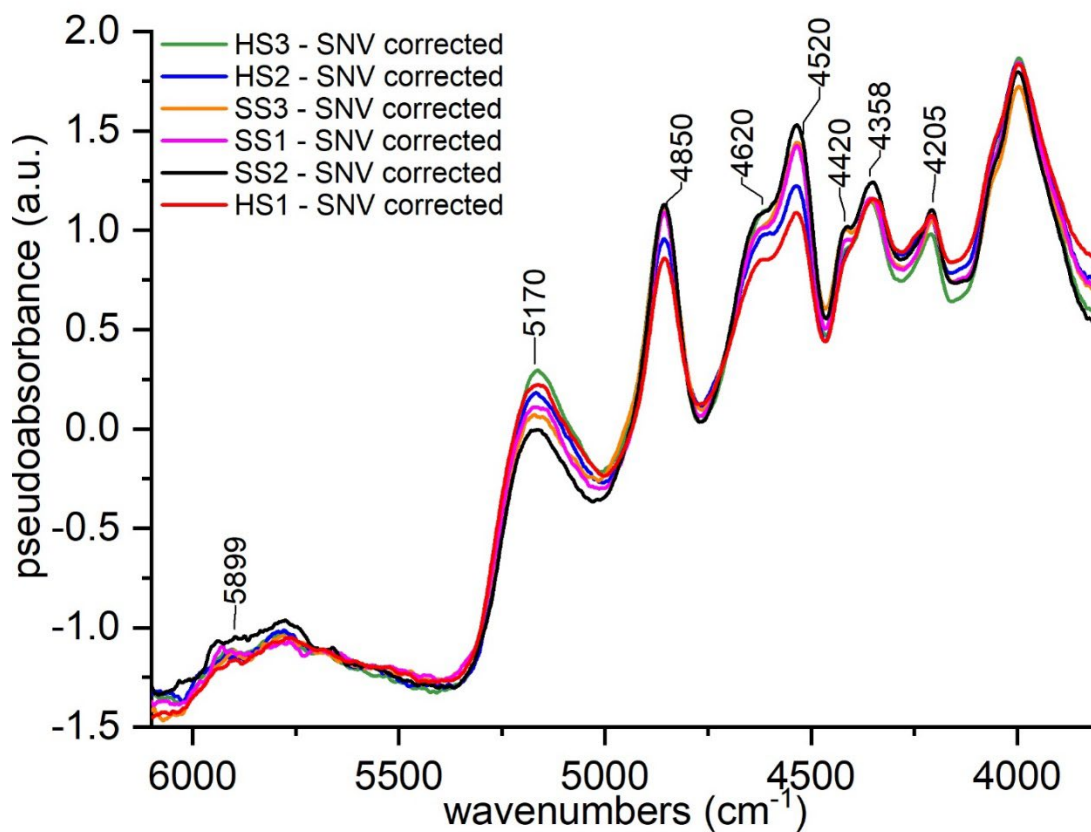

Figure S3. ER-FTIR spectra of hard and soft silk references (region 6100-3800  $\text{cm}^{-1}$ )
